# Supplementary material for: Phylogeny-corrected identification of microbial gene families relevant to human gut colonization
Source: PubMed Central journal article supplement (PMC6084841; doi:10.1371/journal.pcbi.1006242), 2018-08-09
Supplement: pcbi.1006242.s007.pdf [file pcbi.1006242.s007.pdf]

# Shotgun sequencing data

map reads to microbes using MIDAS

relative abundances

binarize

# Whole genomes

MIDAS database

MUSCLE  
FastTree 2

gene families

phylogenetic trees

microbes

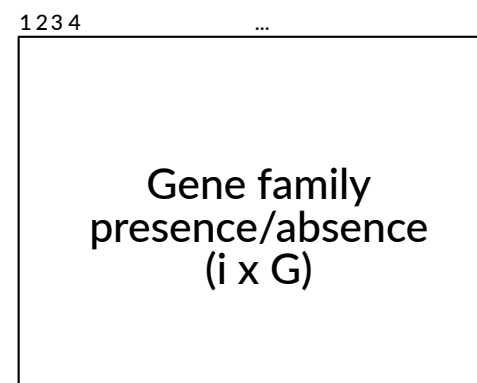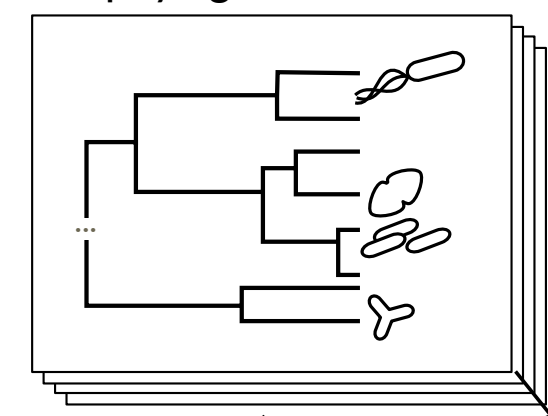

microbes

samples

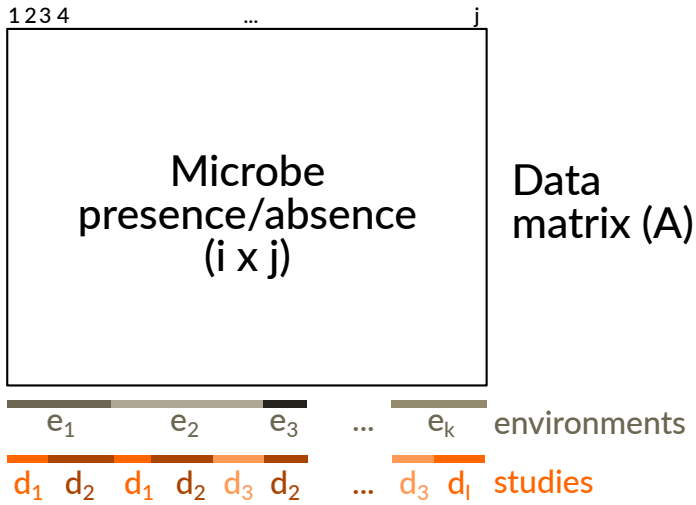

Data matrix (A)

estimate prevalence

$$\hat{\phi}_{x,E,D}^{Prev}(A)$$

(Beta-Binomial estimator)

estimate environmental specificity scores

$$\hat{\phi}_{x,E}^{Spec}(A)$$

(Laplace shrinkage estimator)

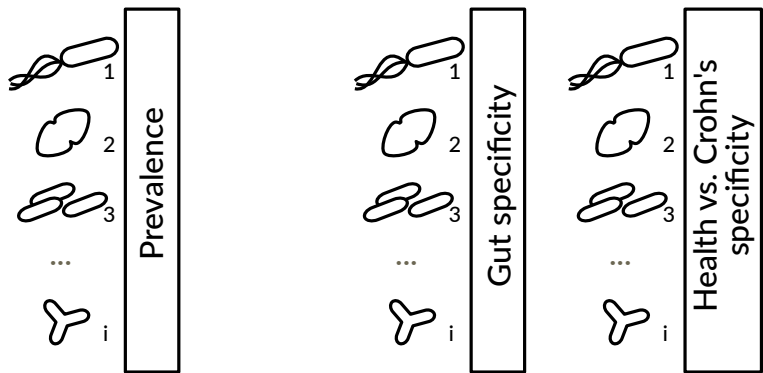

Phenotypes

Phylogenetic linear models  
(G genes x 4 phyla)

FDR correction

Gene-phenotype associations
