# Supplementary material for: Phylogeny-corrected identification of microbial gene families relevant to human gut colonization
Source: PubMed Central journal article supplement (PMC6084841; doi:10.1371/journal.pcbi.1006242), 2018-08-09

**A**

|         | healthy | CD |
|---------|---------|----|
| present | 1       | 1  |
| absent  | 37      | 12 |

|         | healthy | CD |
|---------|---------|----|
| present | 24      | 13 |
| absent  | 14      | 0  |

***Bacillus subtilis***

***Bacteroides fragilis***

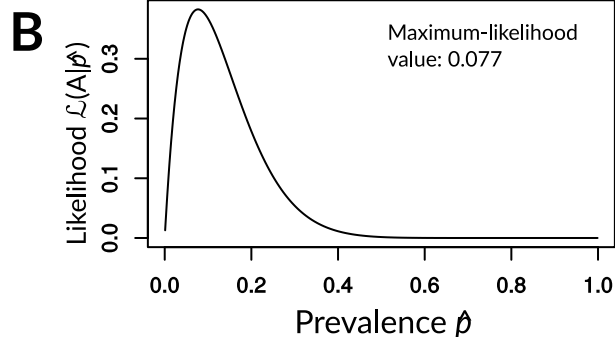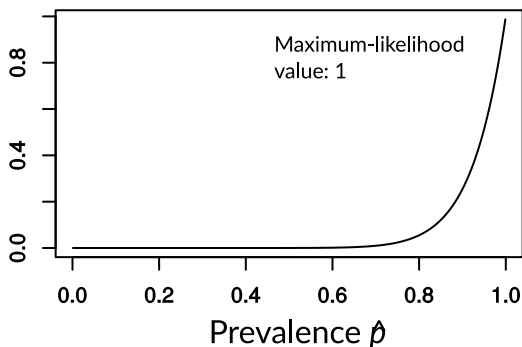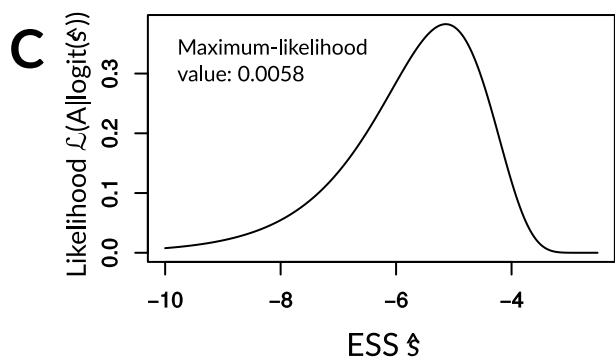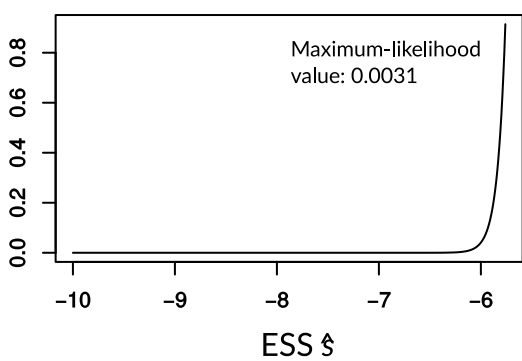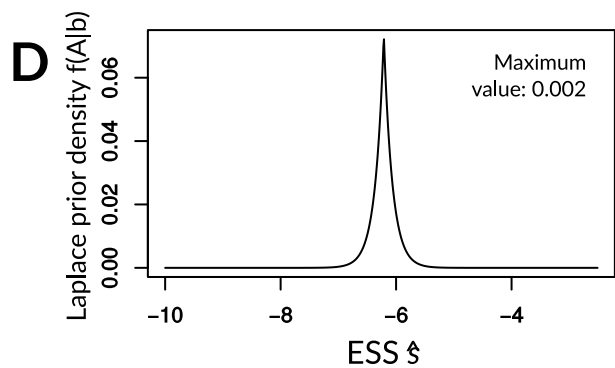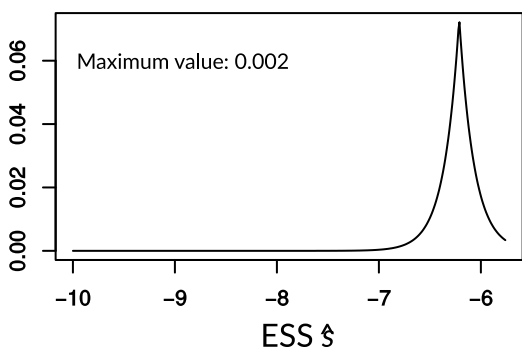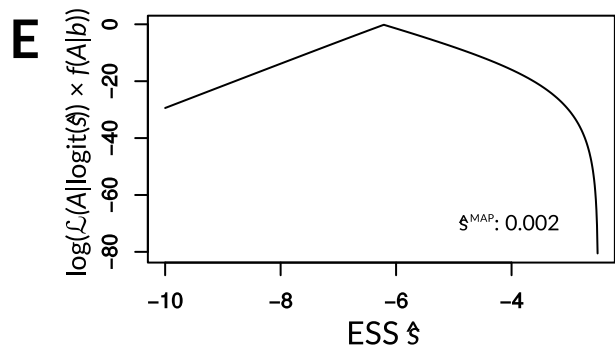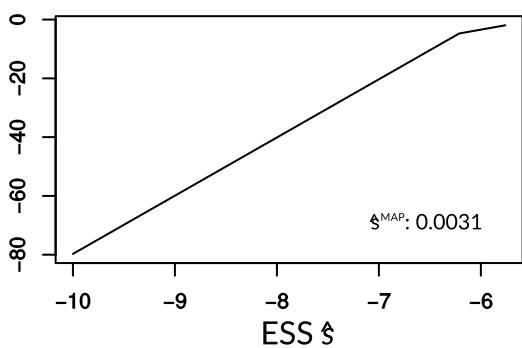

Supplement: pcbi.1006242.s008.pdf [file pcbi.1006242.s008.pdf]
