# Supplementary material for: Phylogeny-corrected identification of microbial gene families relevant to human gut colonization
Source: PubMed Central journal article supplement (PMC6084841; doi:10.1371/journal.pcbi.1006242), 2018-08-09
Supplement: pcbi.1006242.s014.pdf [file pcbi.1006242.s014.pdf]

**A**

Pairwise microbe correlations: relative abundances

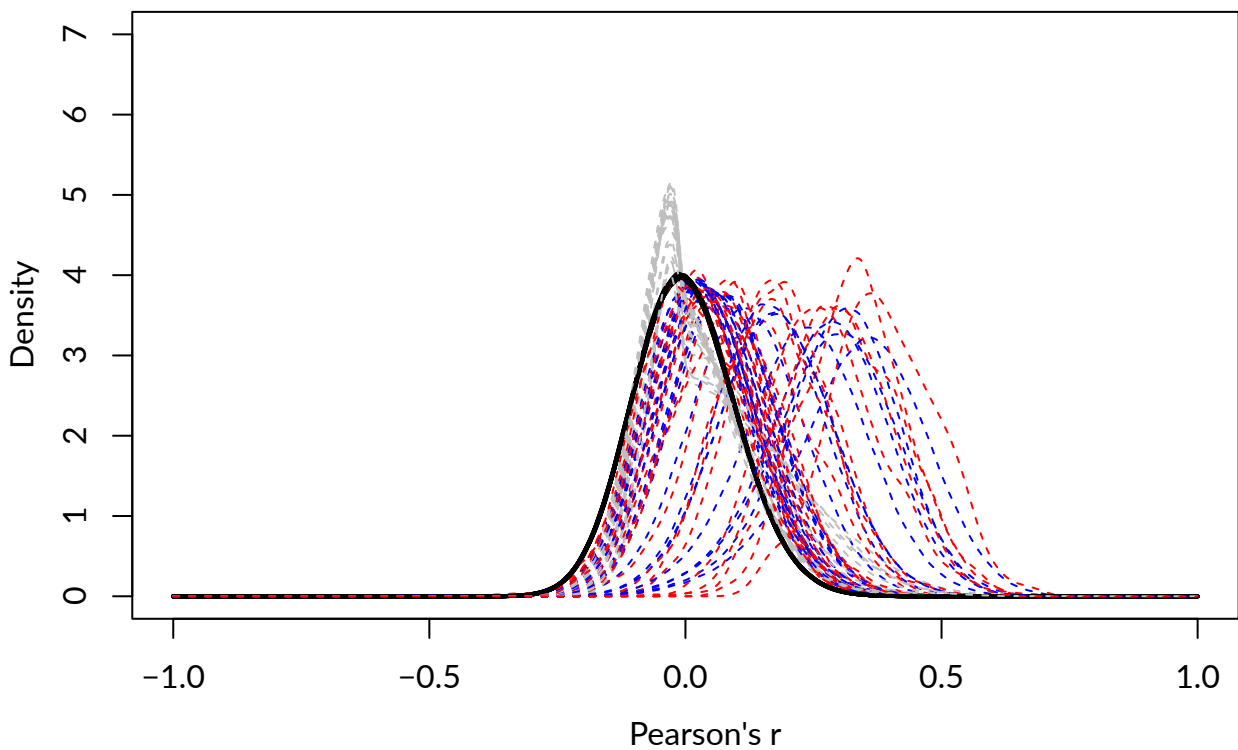

- Ground truth (absolute abundances)
- - - Relative abundances
- - - Relative abundances (from D-M)
- - - Relative abundances (from D-M, only non-zero)

**B**

Pairwise microbe correlations: prevalences

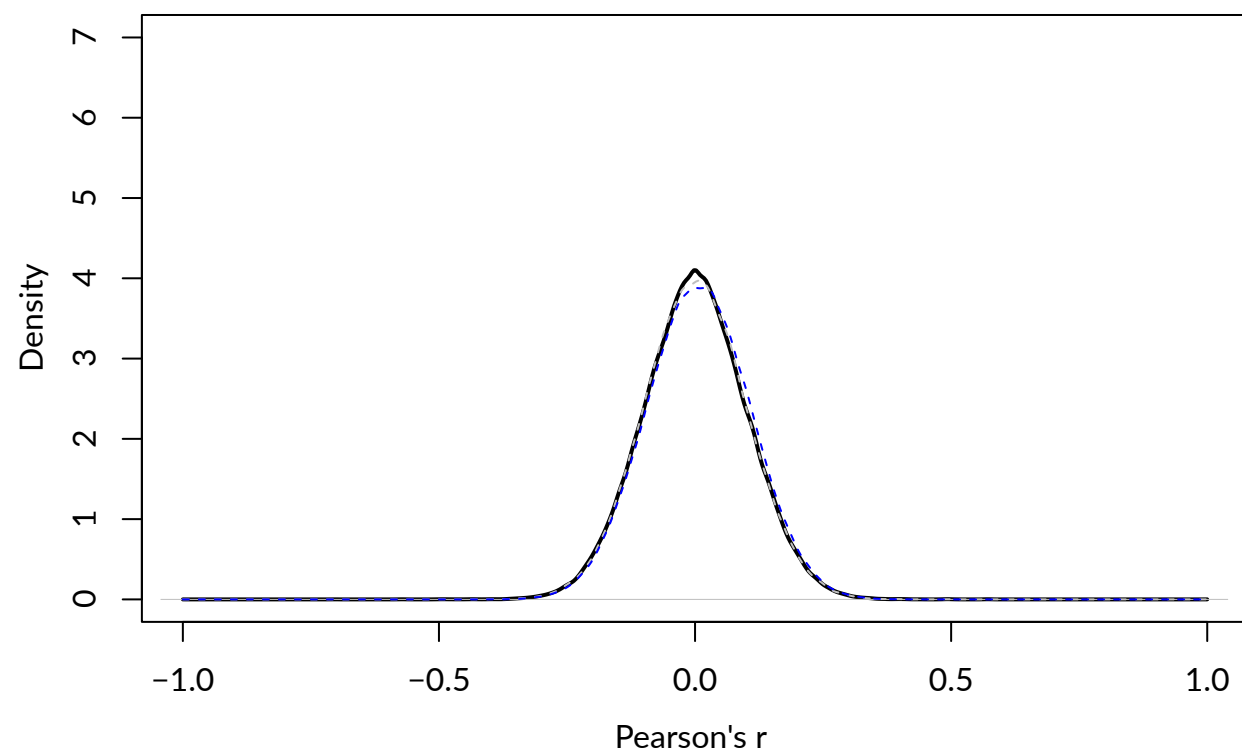

- Ground truth (absolute abundance over zero)
- - - Ground truth (absolute abundance over 0.5)
- - - Simulated prevalences from relative abundance
