# Supplementary material for: Phylogeny-corrected identification of microbial gene families relevant to human gut colonization
Source: PubMed Central journal article supplement (PMC6084841; doi:10.1371/journal.pcbi.1006242), 2018-08-09

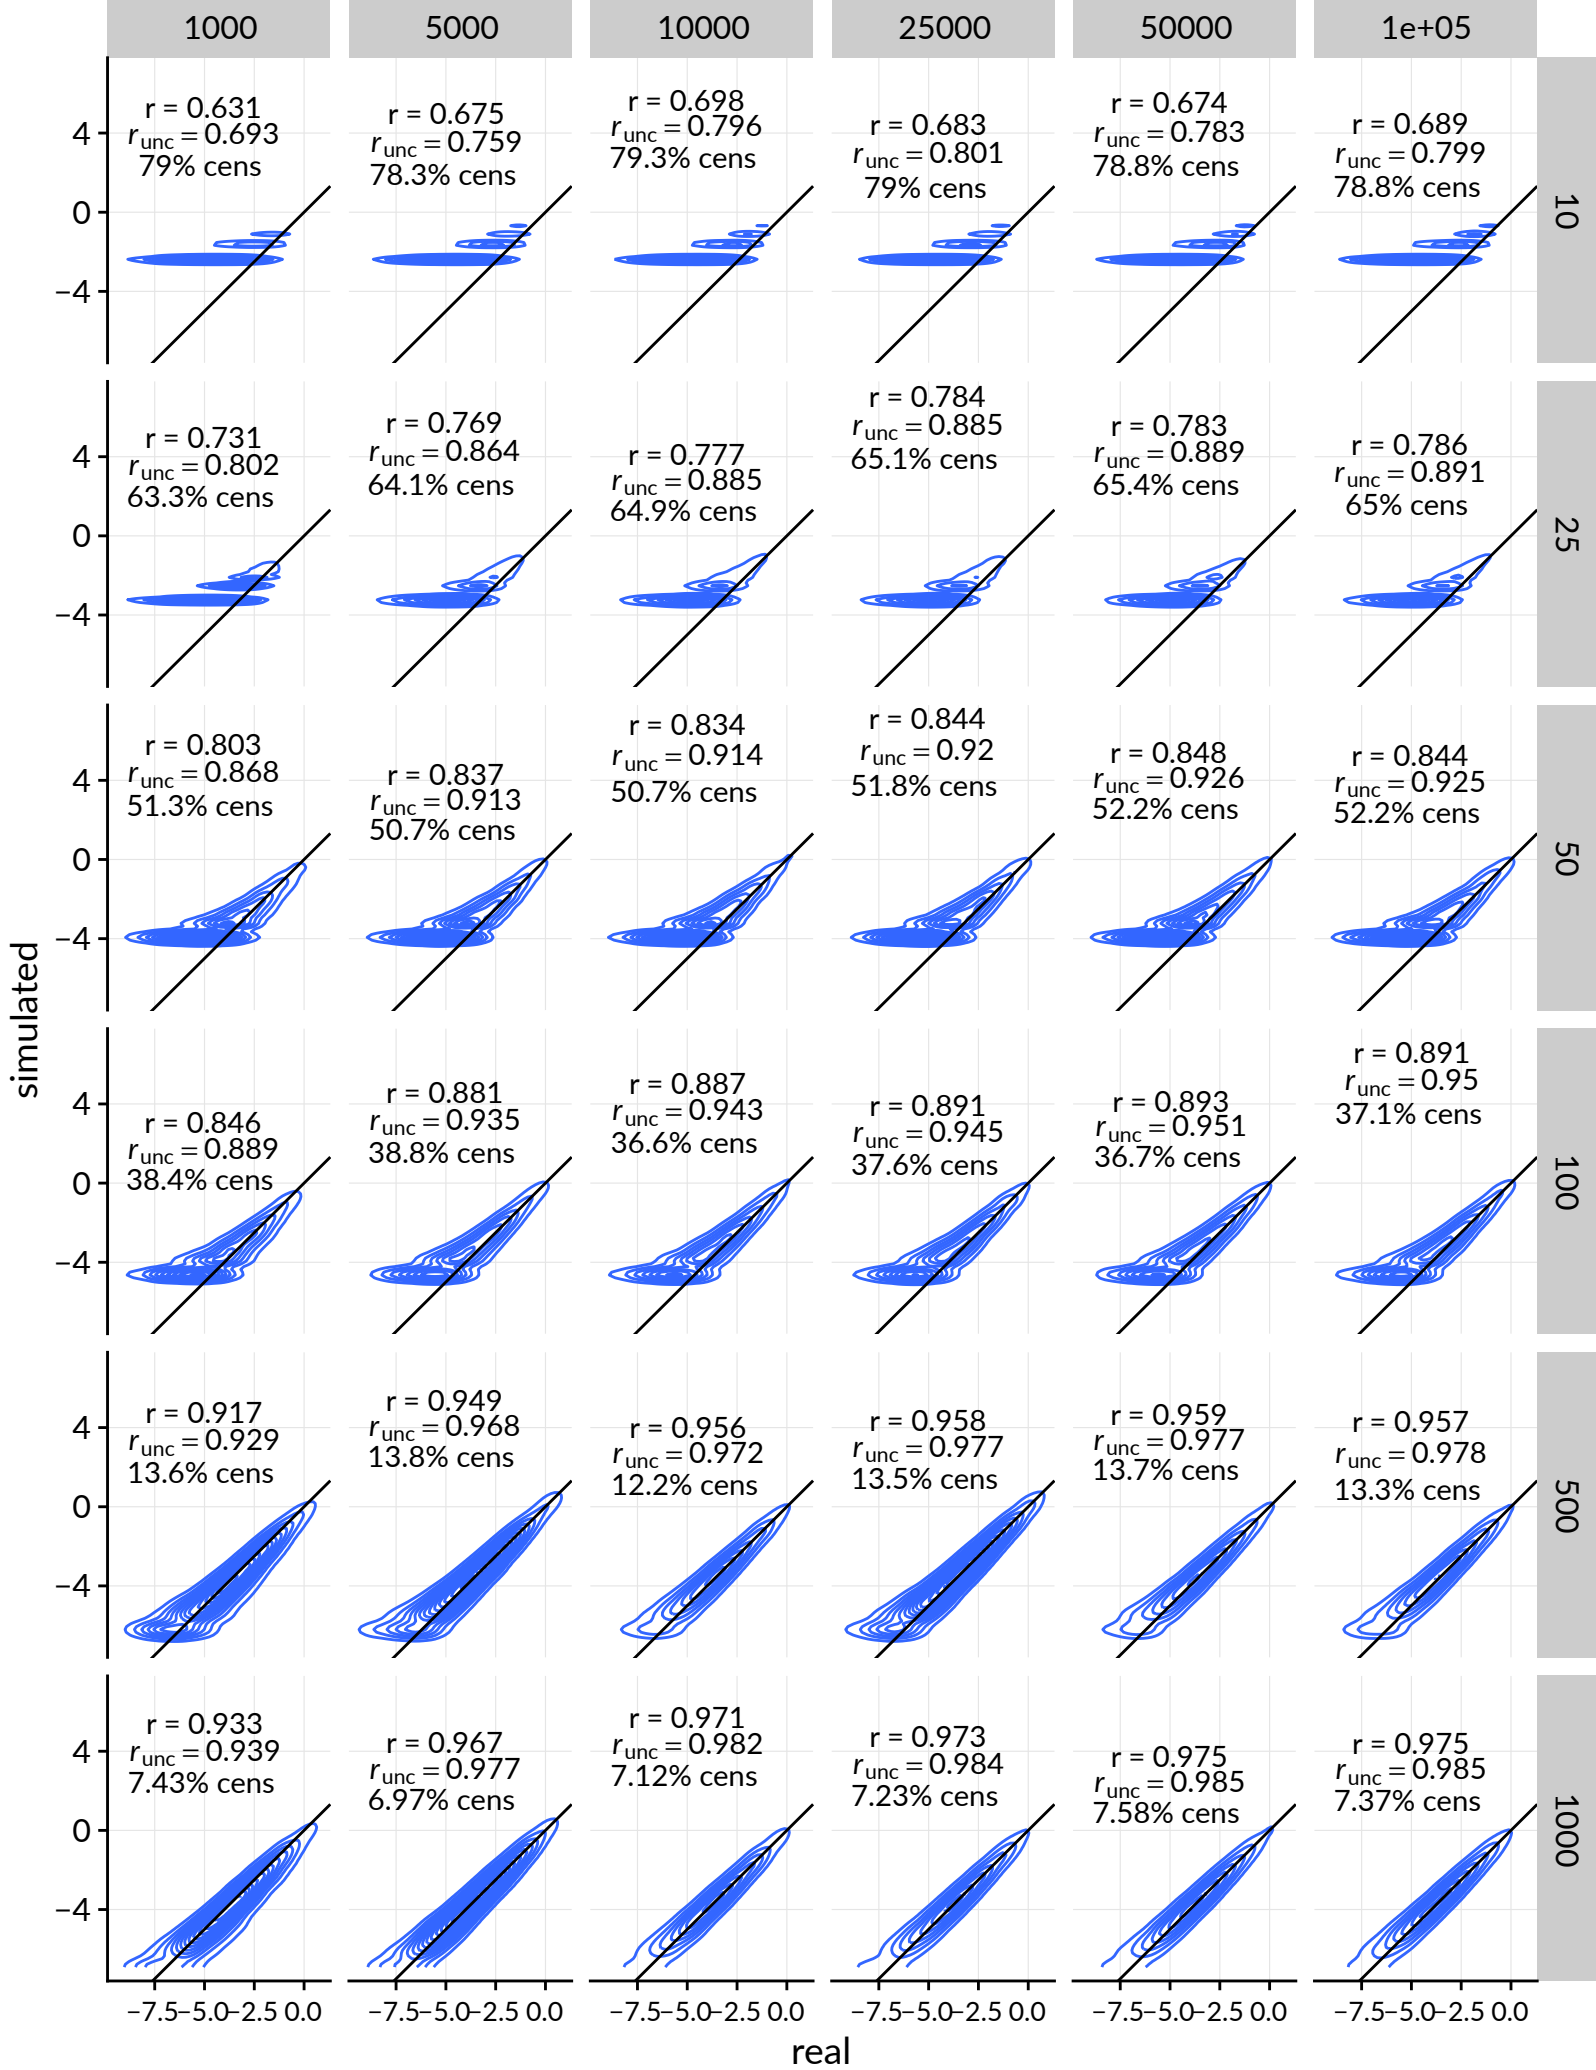

Supplement: pcbi.1006242.s015.pdf [file pcbi.1006242.s015.pdf]
